# Supplementary material for: A series of entangled MOFs constructed from flexible dipyridyl piperazine and rigid dicarboxylate: interpenetration, self-penetration, and polycatenation
Source: Royal Society of Chemistry journal article supplement (doi:10.1039/d2ce00745b), 2022-01-01
Supplement: d2ce00745b1.pdf [file d2ce00745b1.pdf]

## Electronic Supplementary Information

for

# A series of entangled MOFs constructed from flexible dipyridyl piperazine and rigid dicarboxylate: interpenetration, self-penetration and polycatenation

Huiyeong Ju,<sup>a</sup> Seulgi Kim,<sup>b</sup> Jong Hwa Jung<sup>b</sup> and Shim Sung Lee<sup>\*b</sup>

<sup>a</sup> Western Seoul Center, Korea Basic Science Institute, Seoul 03759, South Korea

<sup>b</sup> Department of Chemistry and Research Institute of Natural Sciences, Gyeongsang National University, Jinju 52828, South Korea

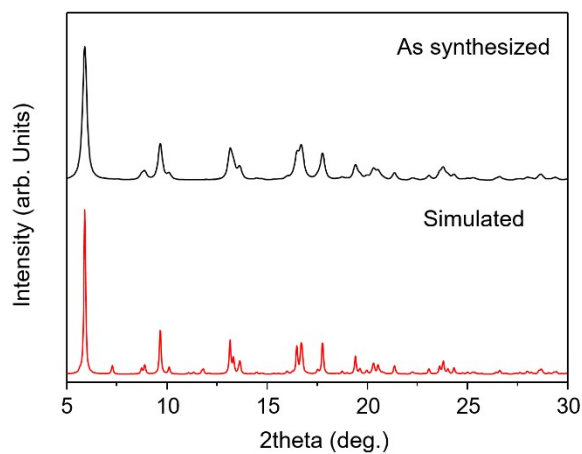

(a)

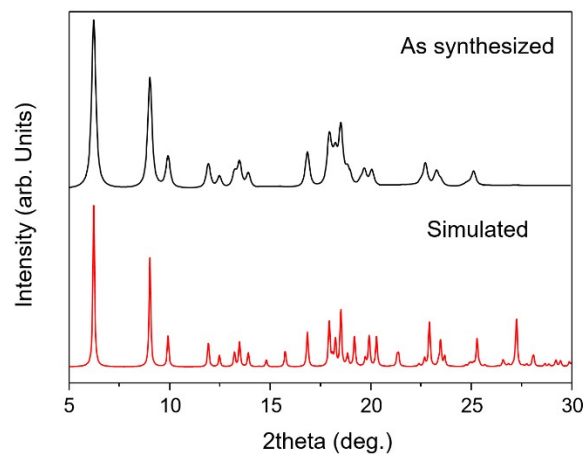

(b)

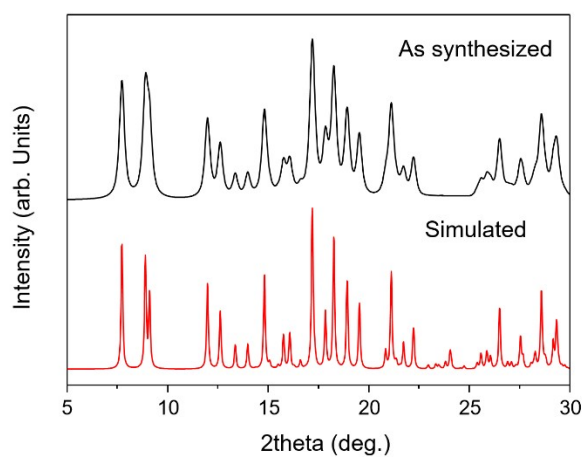

(c)

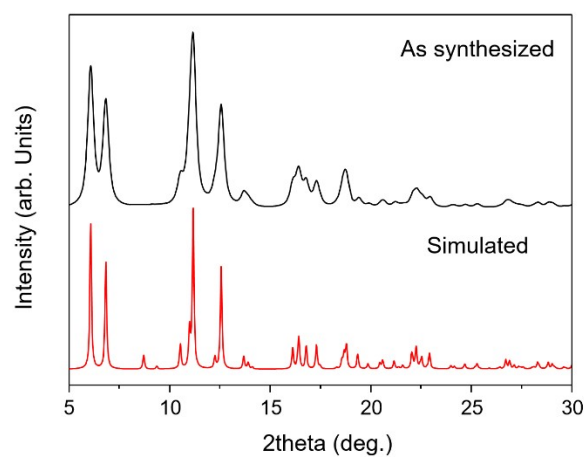

(d)

**Fig. S1** PXRd patterns of (a) **1**, (b) **2**, (c) **3** and (d) **4**.

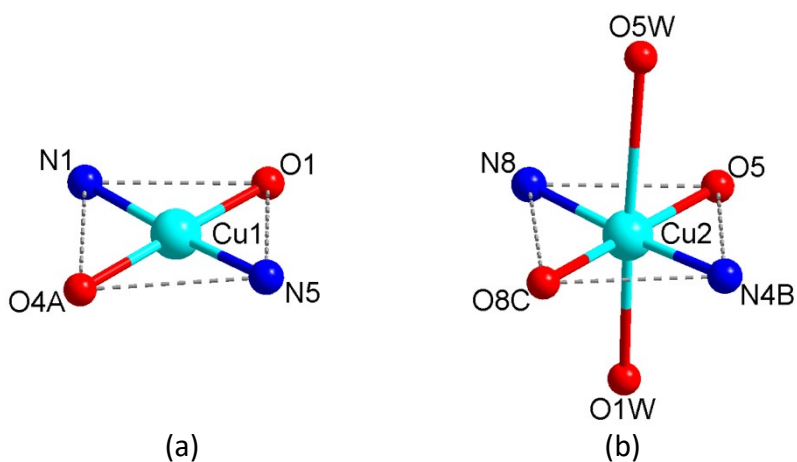

(a)

(b)

**Fig. S2** Local coordination geometries of (a) Cu1 (square planar) and (b) Cu2 (elongated octahedral) atoms in **1**.

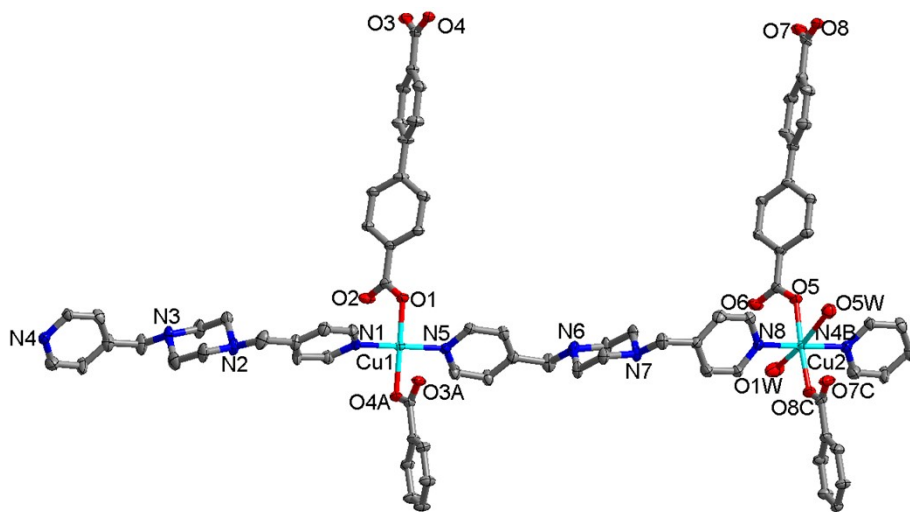

(a)

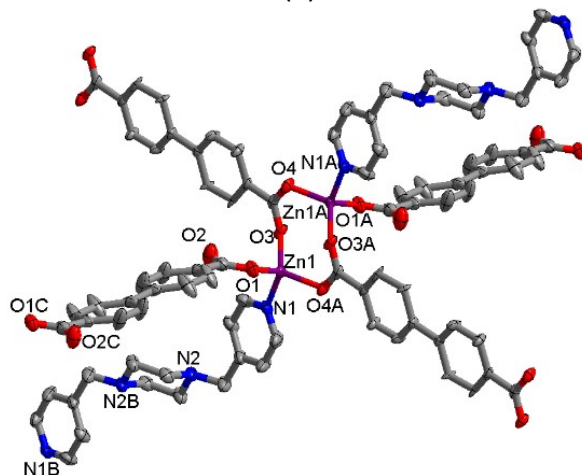

(b)

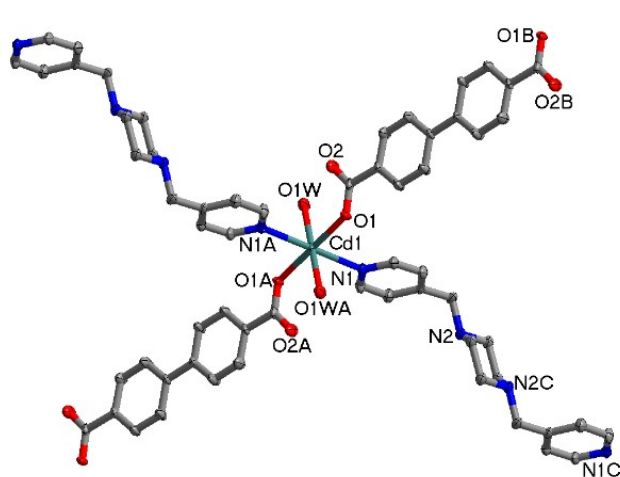

(c)

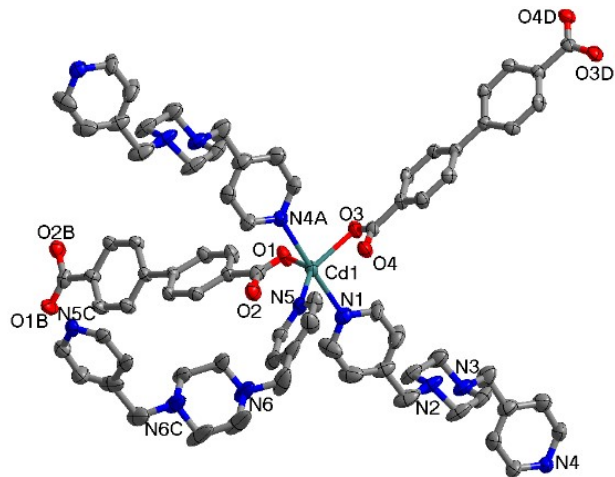

(d)

**Fig. S3** Thermal ellipsoid plot (30% probability) of the crystal structures for (a) **1**, (b) **2**, (c) **3** and (d) **4**.

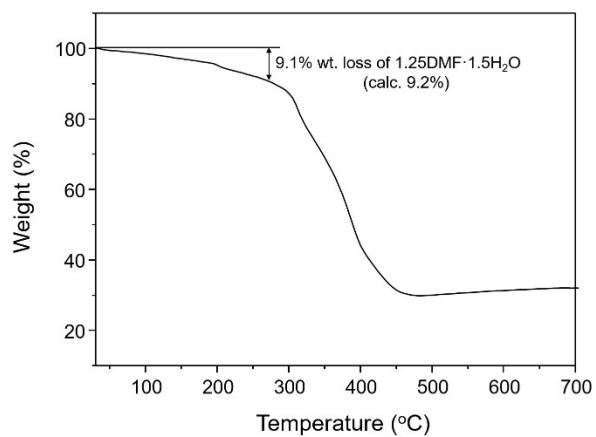

(a)

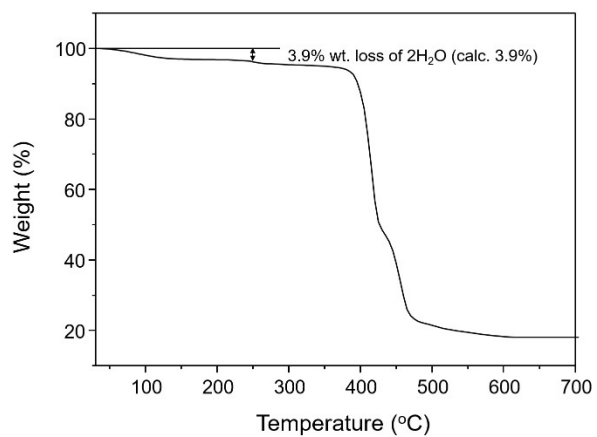

(b)

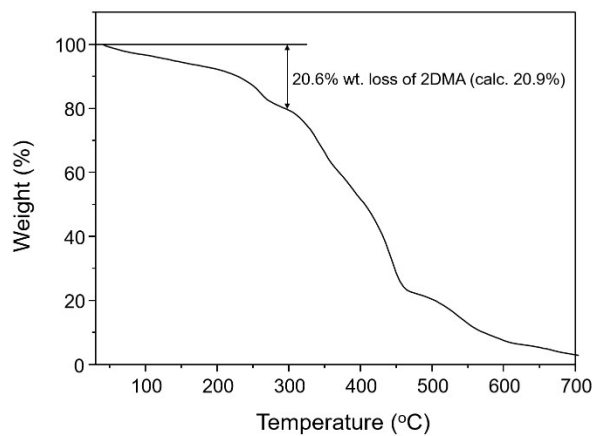

(c)

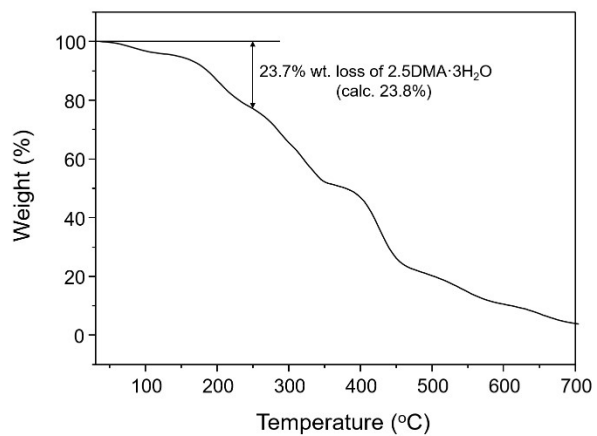

(d)

**Fig. S4** TGA curves for (a) **1**, (b) **2**, (c) **3** and (d) **4**.

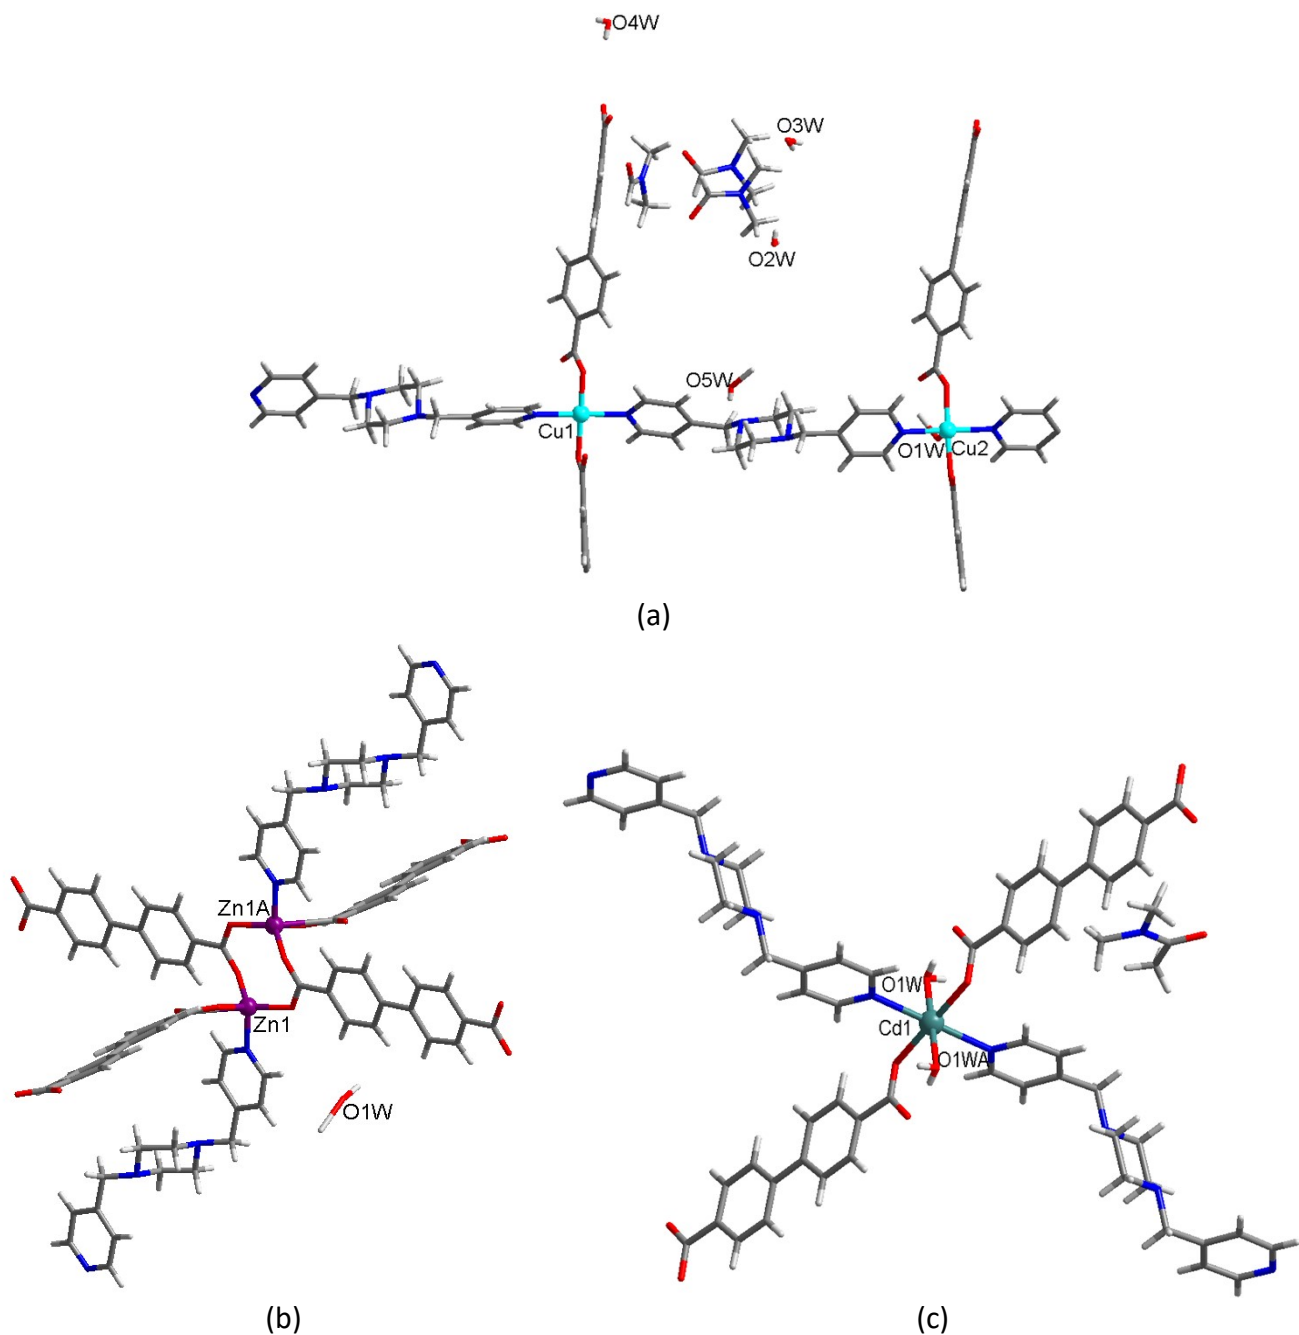

**Fig. S5** The coordination environments of the metal centres for (a) **1**, (b) **2** and (c) **3**. The hydrogen atoms of the water molecules were obtained using the HSite from *ToposPro* Program.<sup>S1</sup>

### Reference

S1. V. A. Blatov, A. P. Shevchenko and D. M. Proserpio, *Cryst. Growth Des.*, 2014, **14**, 3576-3586. (see also <http://topospro.com>)

**Table S1** Crystallographic data and structure refinement for **1-4**

|                                                                                      | <b>1</b>                                                                          | <b>2</b>                                                         | <b>3</b>                                                        | <b>4</b>                                                        |
|--------------------------------------------------------------------------------------|-----------------------------------------------------------------------------------|------------------------------------------------------------------|-----------------------------------------------------------------|-----------------------------------------------------------------|
| formula                                                                              | C <sub>255</sub> H <sub>287</sub> Cu <sub>8</sub> N <sub>37</sub> O <sub>51</sub> | C <sub>22</sub> H <sub>20</sub> N <sub>2</sub> O <sub>5</sub> Zn | C <sub>38</sub> H <sub>50</sub> CdN <sub>6</sub> O <sub>8</sub> | C <sub>38</sub> H <sub>38</sub> CdN <sub>6</sub> O <sub>4</sub> |
| formula weight                                                                       | 5194.52                                                                           | 457.77                                                           | 831.24                                                          | 755.14                                                          |
| temperature, K                                                                       | 173(2)                                                                            | 173(2)                                                           | 173(2)                                                          | 173(2)                                                          |
| crystal system                                                                       | Orthorhombic                                                                      | Triclinic                                                        | Triclinic                                                       | Trigonal                                                        |
| space group                                                                          | <i>P</i> 2 <sub>1</sub> 2 <sub>1</sub> 2 <sub>1</sub>                             | <i>P</i> -1                                                      | <i>P</i> -1                                                     | <i>P</i> 3 <sub>2</sub> 2 <sub>1</sub>                          |
| <i>a</i> (Å)                                                                         | 18.2794(5)                                                                        | 7.0781(2)                                                        | 7.664(4)                                                        | 16.7798(6)                                                      |
| <i>b</i> (Å)                                                                         | 29.9253(8)                                                                        | 10.5603(2)                                                       | 10.968(6)                                                       | 16.7798(6)                                                      |
| <i>c</i> (Å)                                                                         | 13.2838(3)                                                                        | 14.5209(3)                                                       | 12.971(6)                                                       | 28.3067(12)                                                     |
| $\alpha$ (°)                                                                         | 90                                                                                | 77.6050(10)                                                      | 114.880(18)                                                     | 90                                                              |
| $\beta$ (°)                                                                          | 90                                                                                | 84.3170(10)                                                      | 99.231(18)                                                      | 90                                                              |
| $\gamma$ (°)                                                                         | 90                                                                                | 70.9640(10)                                                      | 97.47(2)                                                        | 120                                                             |
| <i>V</i> (Å <sup>3</sup> )                                                           | 7266.5(3)                                                                         | 1001.63(4)                                                       | 952.3(9)                                                        | 6902.3(6)                                                       |
| <i>Z</i>                                                                             | 1                                                                                 | 2                                                                | 1                                                               | 6                                                               |
| <i>D</i> <sub>calc</sub> (g/cm <sup>3</sup> )                                        | 1.187                                                                             | 1.518                                                            | 1.449                                                           | 1.090                                                           |
| $\mu$ (mm <sup>-1</sup> )                                                            | 0.646                                                                             | 1.263                                                            | 0.633                                                           | 0.512                                                           |
| 2 $\theta$ <sub>max</sub> (°)                                                        | 52                                                                                | 52                                                               | 52                                                              | 52                                                              |
| reflections collected                                                                | 51292                                                                             | 16713                                                            | 9842                                                            | 76624                                                           |
| independent reflns                                                                   | 14279 [ <i>R</i> <sub>int</sub> = 0.0858]                                         | 3924 [ <i>R</i> <sub>int</sub> = 0.0362]                         | 3413 [ <i>R</i> <sub>int</sub> = 0.0357]                        | 9030 [ <i>R</i> <sub>int</sub> = 0.1048]                        |
| goodness-of-fit on <i>F</i> <sup>2</sup>                                             | 1.031                                                                             | 1.059                                                            | 1.156                                                           | 1.029                                                           |
| <i>R</i> <sub>1</sub> , <i>wR</i> <sub>2</sub> [ <i>I</i> > 2 $\sigma$ ( <i>I</i> )] | 0.0721, 0.1883                                                                    | 0.0353, 0.0771                                                   | 0.0882, 0.2321                                                  | 0.0453, 0.0965                                                  |
| <i>R</i> <sub>1</sub> , <i>wR</i> <sub>2</sub> (all data)                            | 0.1149, 0.2160                                                                    | 0.0435, 0.0808                                                   | 0.1353, 0.3098                                                  | 0.0756, 0.1071                                                  |

**Table S2** Selected bond lengths (Å) and bond angles (°) for **1**

|             |          |             |          |
|-------------|----------|-------------|----------|
| Cu1-N1      | 1.991(6) | Cu1-N5      | 2.015(7) |
| Cu1-O1      | 1.917(5) | Cu1-O4A     | 1.999(5) |
| Cu2-N4B     | 2.005(7) | Cu2-N8      | 2.011(7) |
| Cu2-O5      | 1.949(5) | Cu2-O8C     | 1.956(6) |
| Cu2-O1W     | 2.448(8) | Cu2-O5W     | 2.896(7) |
| O1-Cu1-N1   | 90.4(3)  | O1-Cu1-O4A  | 178.7(3) |
| N1-Cu1-O4A  | 89.4(3)  | O1-Cu1-N5   | 89.8(3)  |
| N1-Cu1-N5   | 175.5(3) | O4A-Cu1-N5  | 90.5(3)  |
| O5-Cu2-O8C  | 176.4(3) | O5-Cu2-N8   | 92.6(3)  |
| O8C-Cu2-N8  | 90.3(3)  | O5-Cu2-N4B  | 88.8(3)  |
| O8C-Cu2-N4B | 88.2(3)  | N8-Cu2-N4B  | 174.1(3) |
| O5-Cu2-O1W  | 94.7(3)  | O8C-Cu2-O1W | 87.2(3)  |
| N8-Cu2-O1W  | 94.8(3)  | N4B-Cu2-O1W | 90.8(3)  |
| O5-Cu2-O5W  | 79.6(2)  | O8C-Cu2-O5W | 98.5(3)  |
| N8-Cu2-O5W  | 83.8(3)  | N4B-Cu2-O5W | 90.8(3)  |
| O1W-Cu2-O5W | 174.0(2) |             |          |

Symmetry operations: (A)  $-x-1, y-1/2, -z+1/2$ ; (B)  $x+1, y, z+2$ ; (C)  $-x+2, y-1/2, -z+5/2$

**Table S3** Selected bond lengths (Å) and bond angles (°) for **2**

|            |            |            |            |
|------------|------------|------------|------------|
| Zn1-N1     | 2.019(2)   | Zn1-O1     | 1.9349(19) |
| Zn1-O3     | 1.9423(17) | Zn1-O4A    | 1.9548(17) |
| O1-Zn1-N1  | 113.11(8)  | O3-Zn1-N1  | 103.28(8)  |
| O4A-Zn1-N1 | 104.52(8)  | O1-Zn1-O3  | 114.47(8)  |
| O1-Zn1-O4A | 102.69(8)  | O3-Zn1-O4A | 118.41(8)  |

Symmetry operations: (A)  $-x, -y+1, -z+1$

**Table S4** Selected bond lengths (Å) and bond angles (°) for **3**

|              |          |              |          |
|--------------|----------|--------------|----------|
| Cd1-N1       | 2.381(9) | Cd1-O1       | 2.286(7) |
| Cd1-O1W      | 2.326(8) |              |          |
| O1-Cd1-O1A   | 180.0    | O1-Cd1-O1WA  | 88.0(3)  |
| O1A-Cd1-O1WA | 92.0(3)  | O1-Cd1-O1W   | 92.0(3)  |
| O1A-Cd1-O1W  | 88.0(3)  | O1WA-Cd1-O1W | 180.0    |
| O1-Cd1-N1    | 86.9(3)  | O1A-Cd1-N1   | 93.1(3)  |
| O1WA-Cd1-N1  | 84.1(3)  | O1W-Cd1-N1   | 95.9(3)  |
| O1-Cd1-N1A   | 93.1(3)  | O1A-Cd1-N1A  | 86.9(3)  |
| O1WA-Cd1-N1A | 95.9(3)  | O1W-Cd1-N1A  | 84.1(3)  |
| N1-Cd1-N1A   | 180.0(5) |              |          |

Symmetry operations: (A)  $-x+2, -y+2, -z$

**Table S5** Selected bond lengths (Å) and bond angles (°) for **4**

---

|            |            |            |            |
|------------|------------|------------|------------|
| Cd1-N1     | 2.365(6)   | Cd1-N4A    | 2.357(6)   |
| Cd1-N5     | 2.350(6)   | Cd1-O1     | 2.296(4)   |
| Cd1-O3     | 2.333(4)   | Cd1-O4     | 2.454(4)   |
| O1-Cd1-O3  | 87.21(16)  | O1-Cd1-N5  | 136.56(18) |
| O3-Cd1-N5  | 136.20(18) | O1-Cd1-N4A | 90.3(2)    |
| O3-Cd1-N4A | 89.8(2)    | N5-Cd1-N4A | 88.9(2)    |
| O1-Cd1-N1  | 86.50(19)  | O3-Cd1-N1  | 86.7(2)    |
| N5-Cd1-N1  | 95.7(2)    | N4A-Cd1-N1 | 175.4(2)   |
| O1-Cd1-O4  | 141.43(17) | O3-Cd1-O4  | 54.45(16)  |
| N5-Cd1-O4  | 81.93(18)  | N4A-Cd1-O4 | 93.32(19)  |
| N1-Cd1-O4  | 87.14(18)  |            |            |

---

Symmetry operations: (A) x, y+1, z
